# Supplementary material
Source: publisher site journal article supplement (https://www.dovepress.com/article/560473)
Supplement: Supplementary file 1 [file 560473%20Supplementary.docx]

**Supplementary Table 1.** Pharmacological inhibitors of endocytic pathways used in uptake experiments: compound name, final concentration, molecular function, catalogue numbers, and references.

| Endocytic Inhibitor | Concentration | Molecular function | Cat. Nr. | Ref |
| --- | --- | --- | --- | --- |
| EIPA | 30 µM | blocks Na⁺/H⁺ exchange;  inhibitor of macropinocytosis | A3085 | 1 |
| Dynasore | 80 µM | dynamin inhibitor | 324410 | 2 |
| MβCD | 2.5 mM | depletes cholesterol | 332615 | 3 |
| Genistein | 100 µM | protein kinases inhibitor | G6649 | 4 |
| Latrunculin B | 10 µM | actin polymerisation inhibitor | L5163 | 5 |
| ML-141 | 10 µM | Cdc42/Rac-1 GTPase inhibitor | 217708 | 6 |
| Wortmannin | 1 µM | phosphatidylinositol 3-kinase inhibitor | W1628 | 7 |

**Abbreviations:** methyl-β-cyclodextrin (MβCD); ethyl-isopropyl amiloride (EIPA).

**
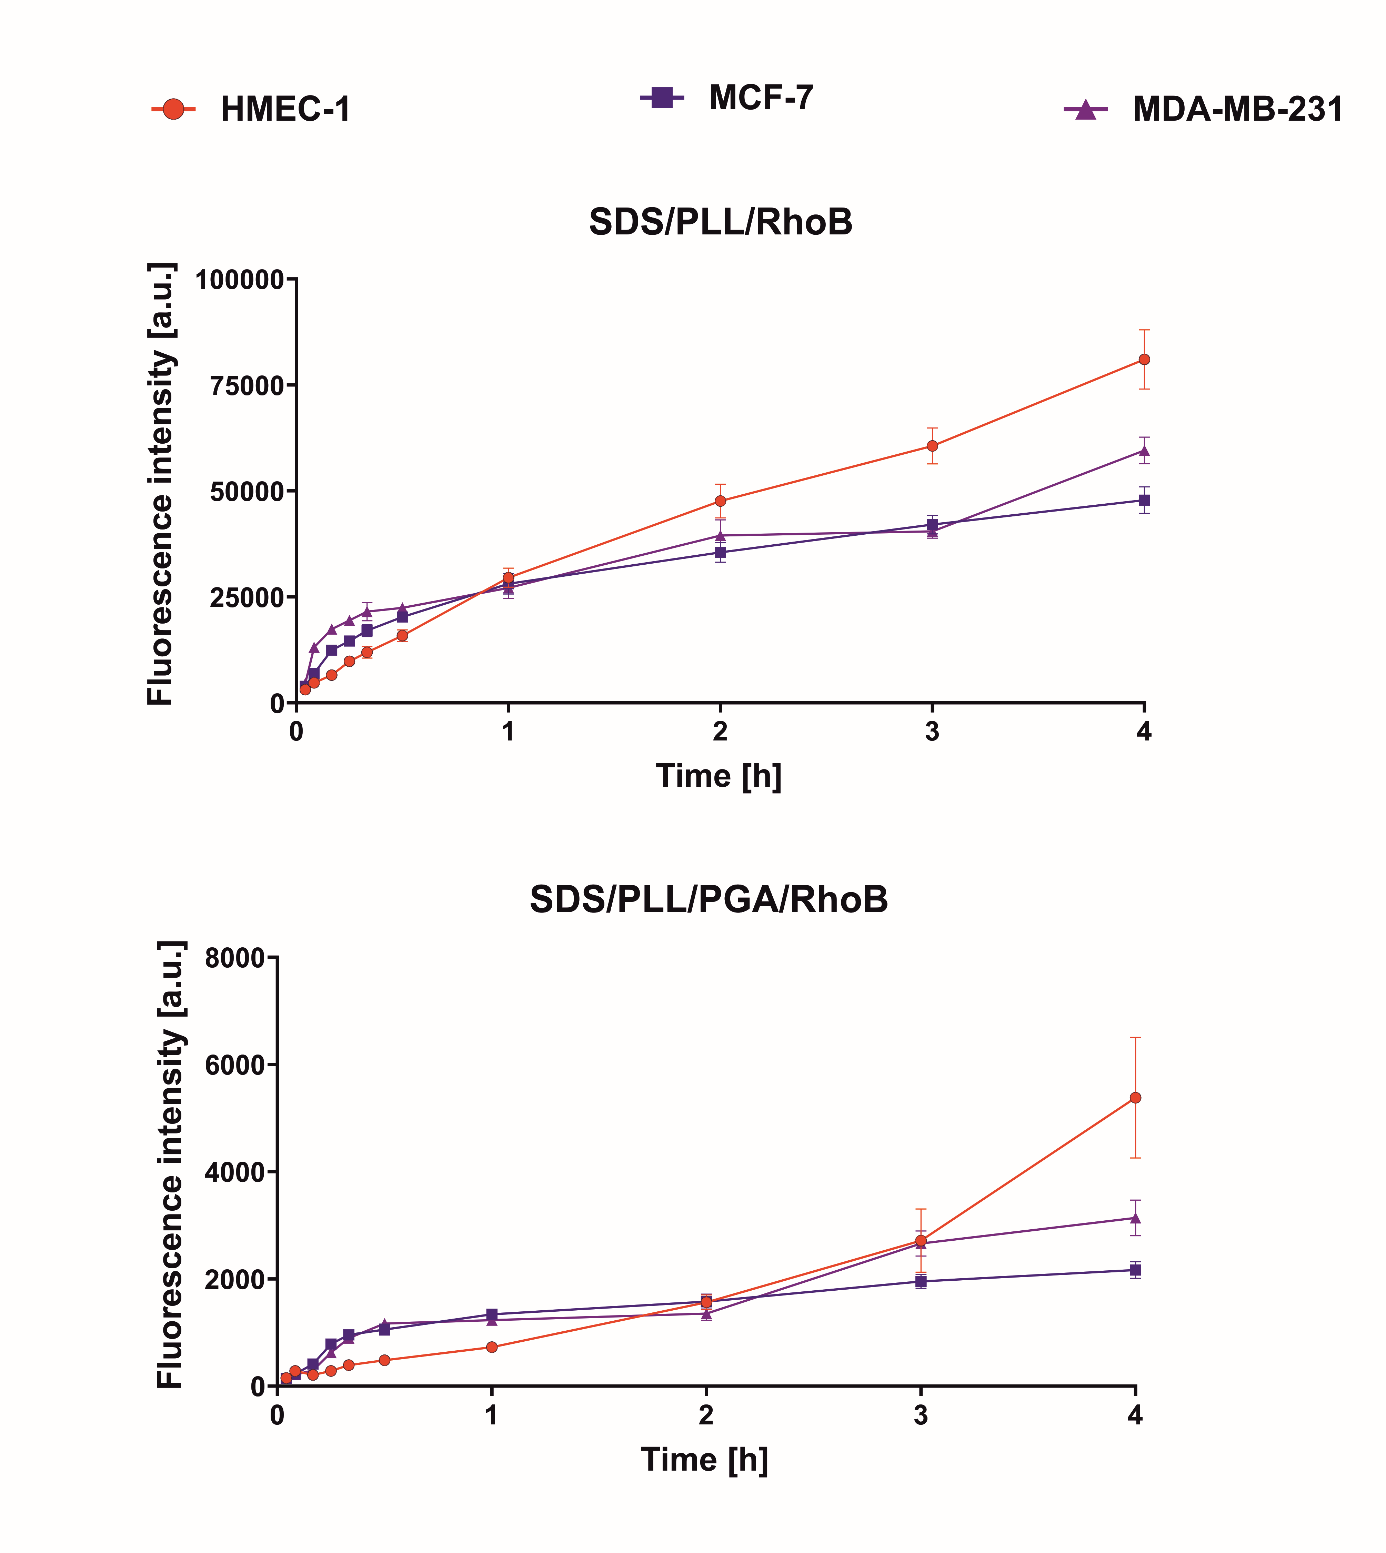
**

**Supplementary Figure 1.** Time-dependent uptake of SDS/PLL/Rho B and SDS/PLL/PGA/Rho B by HMEC-1, MCF-7, and MDA-MB-231 cells. Flow cytometry analysis was used to calculate the slope coefficient, representing the rate of NCs influx into cells. Results are presented as mean ± SD from 3–4 independent experiments.

**Supplementary Table 2.** Time-dependent uptake of SDS/PLL/Rho B and SDS/PLL/PGA/Rho B by HMEC-1, MCF-7, and MDA-MB-231 cells. Flow cytometry analysis was used to calculate the slope coefficient, representing the rate of NCs influx into cells. Results are presented as mean ± SD from 3–4 independent experiments.

| Type of NCs | HMEC-1 | MCF-7 | MDA-MB-231 |
| --- | --- | --- | --- |
| Slope of SDS/PLL/RhoB | 28007 | 34788 | 33520 |
| 95% confidence intervals for SDS/PLL/RhoB | 24605 to 31409 | 21001 to 48576 | 5296 to 61744 |
| Slope of SDS/PLL/PGA/RhoB | 655.4 | 2179 | 2380 |
| 95% confidence intervals for SDS/PLL/PGA/RhoB | 275.7 to 1035 | 1261 to 3096 | 1812 to 2947 |

**Reference:**

1. Koivusalo M, Welch C, Hayashi H, et al. Amiloride inhibits macropinocytosis by lowering submembranous pH and preventing Rac1 and Cdc42 signaling. *J Cell Biol.* 2010;188(4):547-563.

2. Macia E, Ehrlich M, Massol R, Boucrot E, Brunner C, Kirchhausen T. Dynasore, a cell-permeable inhibitor of dynamin. *Dev Cell.* 2006;10(6):839-850.

3. Zidovetzki R, Levitan I. Use of cyclodextrins to manipulate plasma membrane cholesterol content: Evidence, misconceptions and control strategies. *Bba-Biomembranes.* 2007;1768(6):1311-1324.

4. Vercauteren D, Vandenbroucke RE, Jones AT, et al. The Use of Inhibitors to Study Endocytic Pathways of Gene Carriers: Optimization and Pitfalls. *Mol Ther.* 2010;18(3):561-569.

5. Peng GE, Wilson SR, Weiner OD. A pharmacological cocktail for arresting actin dynamics in living cells. *Mol Biol Cell.* 2011;22(21):3986-3994.

6. Surviladze Z, Waller A, Strouse JJ, et al. A Potent and Selective Inhibitor of Cdc42 GTPase. In: *Probe Reports from the NIH Molecular Libraries Program.* Bethesda (MD)2010.

7. Araki N, Johnson MT, Swanson JA. A role for phosphoinositide 3-kinase in the completion of macropinocytosis and phagocytosis by macrophages. *J Cell Biol.* 1996;135(5):1249-1260.
